# Supplementary material
Source: publisher figshare collection journal article supplement (https://tandf.figshare.com/articles/dataset/_/22581980)

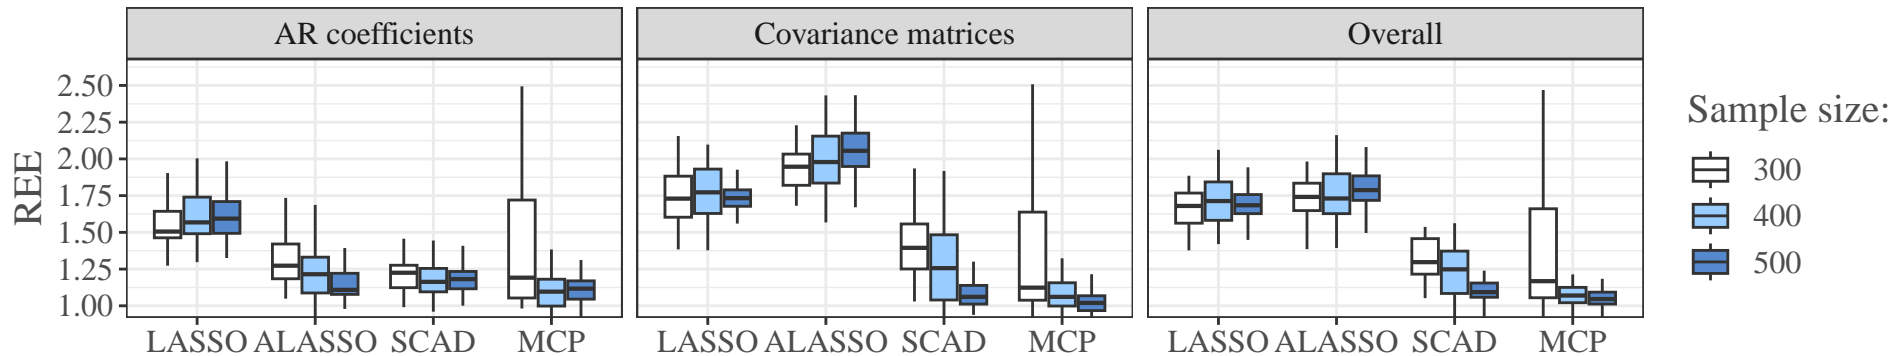

Supplement: Supplementary file 1 [file 2]

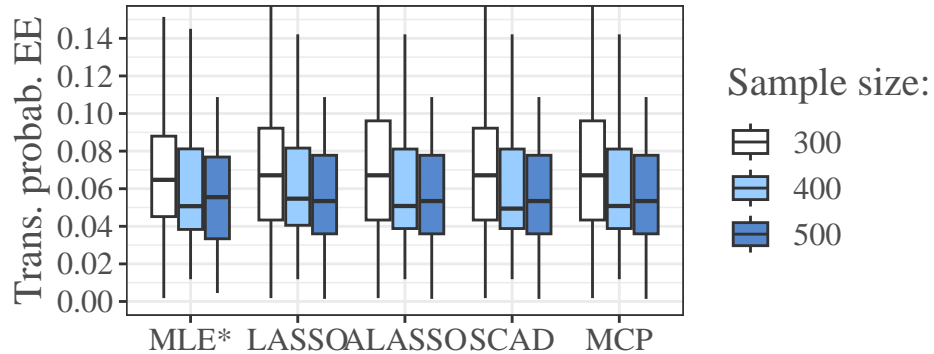

Supplement: Supplementary file 2 [file 2]

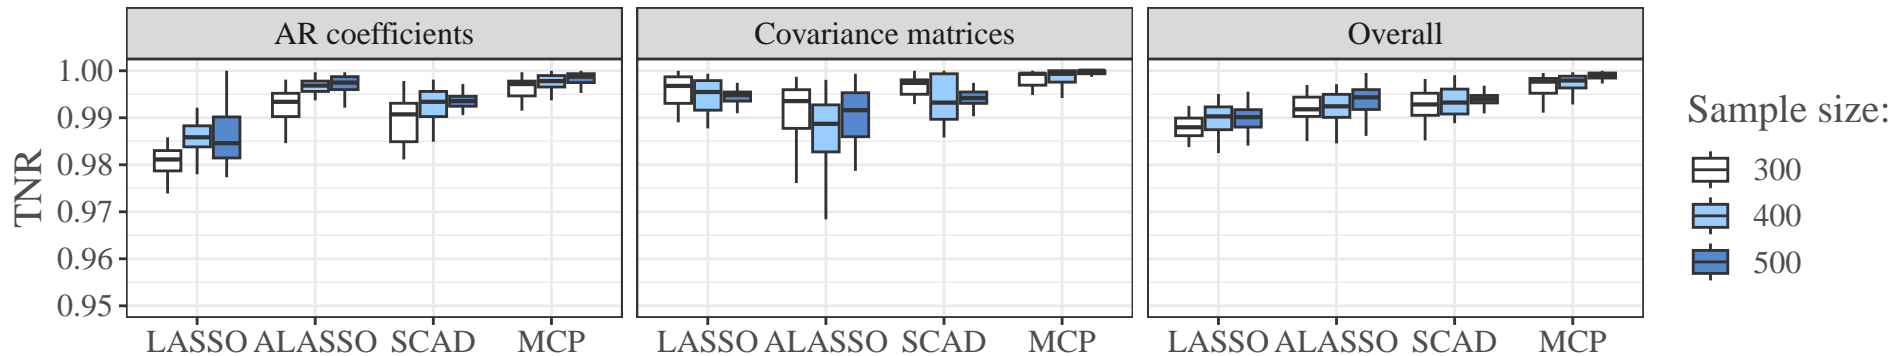

Supplement: Supplementary file 3 [file 2]

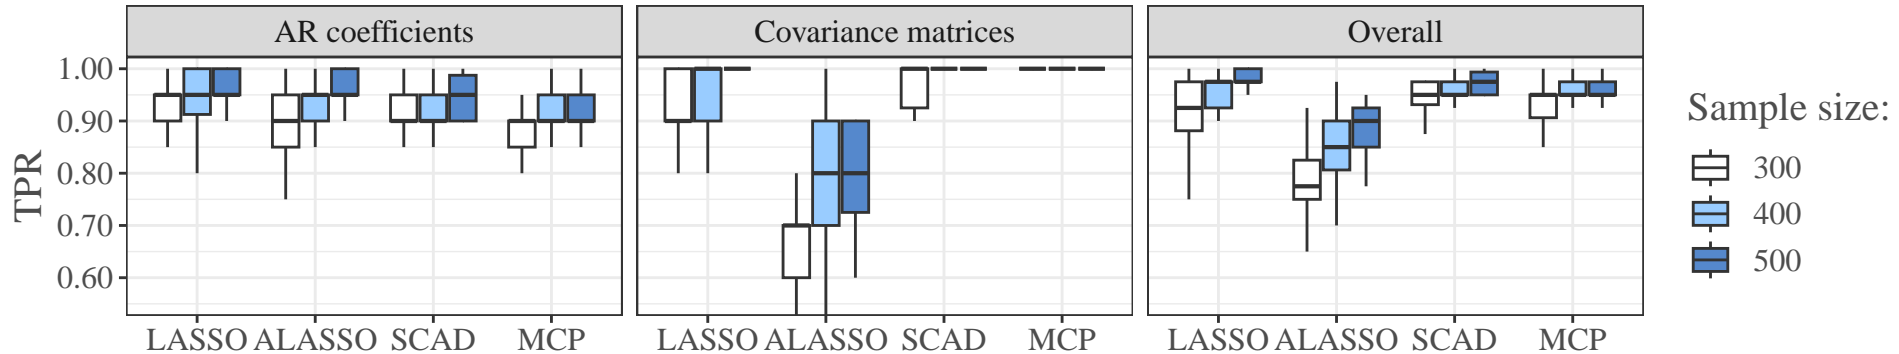

Supplement: Supplementary file 4 [file 2]

Overall EE

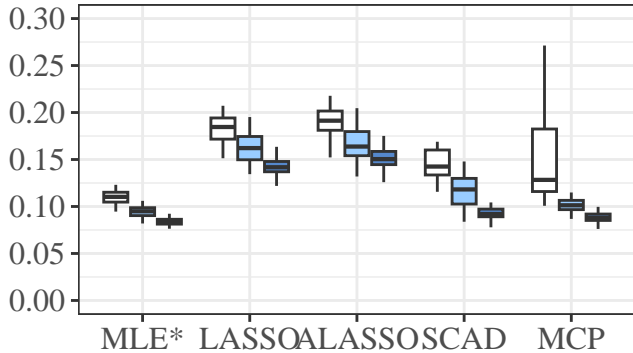

Sample size:

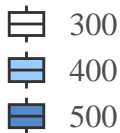

Supplement: Supplementary file 6 [file 2]
